# Supplementary material for: Boosting ultralong organic phosphorescence performance by synergistic heavy-atom effect and multiple intermolecular interactions in molecular crystal
Source: Royal Society of Chemistry journal article supplement (doi:10.1039/d2tc00748g), 2022-01-01
Supplement: d2tc00748g1.pdf [file d2tc00748g1.pdf]

## Electronic Supplementary Information

### **Boosting ultralong organic phosphorescence performance by synergistic heavy-atom effect and multiple intermolecular interactions in molecular crystal**

Huiting Mao,<sup>‡ a,b,c</sup> Jing Gao,<sup>‡ a</sup> Weijun Zhao,<sup>d</sup> Tingting Wang,<sup>a</sup> Guo-Gang Shan,<sup>a,\*</sup> Yun Geng,<sup>a,\*</sup> Kuizhan Shao,<sup>a</sup> Xinlong Wang<sup>a</sup> and Zhongmin Su<sup>c\*</sup>

*<sup>a</sup>Institute of Functional Material Chemistry and National & Local United Engineering Lab for Power Battery, Faculty of Chemistry, Northeast Normal University, Changchun, 130024, China, E-mail: [shangg187@nenu.edu.cn](mailto:shangg187@nenu.edu.cn) (G. S.), [gengy575@nenu.edu.cn](mailto:gengy575@nenu.edu.cn) (Y. G.)*

*<sup>b</sup>College of Life Science, Dalian Minzu University, Dalian, 116600, China*

*<sup>c</sup>College of Chemistry, Jilin University, Changchun, Jilin, 130012, China*

*E-mail: [zmsu@nenu.edu.cn](mailto:zmsu@nenu.edu.cn)*

*<sup>d</sup>School of Chemistry and Molecular Engineering, East China University of Science & Technology, Shanghai, 200237, China*

*<sup>‡</sup>Authors contributed equally to this paper.*

## **Experimental section**

### **Materials and methods**

Unless otherwise noted, all reagents used in the experiments were purchased from commercial sources without further purification. For column chromatography, silica gel with 300~400 mesh was used. These compounds were synthesized according to the similar experimental procedures reported previously. Nuclear magnetic resonance ( $^1\text{H}$  and  $^{13}\text{C}$  NMR) spectra were obtained on a Bruker Avance 500 MHz spectrometer. High-resolution mass spectra (HRMS) were tested on Bruker microtof or Hybrid Quadrupole-Orbitrap GC-MS/MS system (Q Exactive GC). X-ray crystallography was measured by a Bruker Apex CCD II area-detector diffractometer. Ultraviolet absorption spectra were obtained by Cary 500 UV-Vis-NIR spectrophotometer. Steady-state photoluminescence (PL) and phosphorescence spectra were measured using FL-4600 FL spectrophotometer. The lifetime and time-resolved emission spectra were obtained on FLSP920 Edinburgh Fluorescence Spectrometer equipped with a xenon arc lamp (Xe900), a nanosecond hydrogen flash-lamp (nF920), and a microsecond flash-lamp ( $\mu\text{F900}$ ), respectively. PL quantum efficiency (PLQE) was collected on a Hamamatsu Absolute PL Quantum Yield Spectrometer C11347 under ambient conditions.

### **Theoretical calculations**

The geometrical, electronic structures and relevant photophysical properties are calculated with the Gaussian 16,<sup>[1]</sup> ADF 2016<sup>[2]</sup> and MOMAP<sup>[3]</sup> program packages. The density functional theory (DFT) and time-dependent density functional theory (TDDFT)<sup>[4]</sup> are selected for calculated molecules in ground states and excited states, respectively. The geometrical structures of monomers and dimers taken from the experimental crystals are optimized at B3LYP/6-311G\* and B3LYP-D3/6-311G\* level, respectively. The excitation energies and oscillator strengths are also calculated at the same computational level. Considering the intermolecular interaction effects, the Quantum Mechanics/Molecular Mechanics (QM/MM) method<sup>[5]</sup> is used to optimize the geometrical structures of the dimers.

The chosen dimers are calculated at the QM level and the surrounding molecules are treated at MM level with the universal force field (UFF).<sup>[6]</sup> The spin-orbital coupling (SOC) matrix element values are calculated by the ADF 2016 program package with the B3LYP functional and the ZORA/DZP basis set.<sup>[7]</sup>

The reorganization energy ( $\lambda$ ) can be calculated by Nelson's four-point method:

$$\lambda_{T_1} = \lambda_1(H) + \lambda_2(G) = [E(^3H_{fc}) - E(^3H_{opt})] + [E(^0G_{fc}) - E(^0G_{opt})] \quad (1)$$

$$\lambda_{S_0} = \lambda_1(H) + \lambda_2(G) = [E(^1H_{fc}) - E(^1H_{opt})] + [E(^0G_{fc}) - E(^0G_{opt})] \quad (2)$$

where opt and fc represent the optimized states and Franck-Condon excited states, respectively. The spin multiplicity is labeled as the superscript.

The MOMAP software is used to calculate the Huang-Rhys factor:

$$HR_j = \omega_j D_j^2 / 2\hbar \quad (3)$$

Where  $\omega_j$  represents the frequency of a certain vibration mode,  $D_j$  represents the displacement vector in a certain vibration mode.

### **Single crystal cultivation**

All the crystals were obtained via slow evaporation in a mixture of dichloromethane/ethyl acetate (3:1, v/v) at room temperature.

### **The preparation of encryption and anti-counterfeiting patterns**

The ink based on ***o*-MOPP** and **BrTMOPP** powder was firstly prepared with aloe vera gel. Then the ink was printed onto a piece of black paper with screen printing technique. After heat treatment for 30 minutes, a pattern with UOP feature was obtained. The lotus, lantern, and "Fu" (made by **BrTMOPP**) and auspicious cloud (made by ***o*-MOPP**) were clearly visualized under 365 nm UV-lamp irradiation. When switching off the UV-lamp, only lotus, lantern, and "Fu" with green emission can be observed by the naked eye. The preparation method of double crane pattern was described above.

### **Synthesis and characterization**

**Synthesis of 10-(4-bromo-3-methylphenyl)-10*H*-phenothiazine 5,5-dioxide (BrMOPP).**

Into a round-bottom flask was placed toluene solution (100 mL) with phenothiazine (2.00 g, 10 mmol), 1-bromo-4-iodo-2-methylbenzene (3.58 g, 12 mol), potassium tert-butoxide (1.69 g, 15 mmol), palladium acetate (0.11 g, 0.5 mmol), and tri-tert-butylphosphine (0.5 mL, 0.25 mmol). Then the mixture was stirred at 110 °C for 12 hours. The reaction mixture was extracted with CH<sub>2</sub>Cl<sub>2</sub> for three times. Then the organic layer was collected and dried with Na<sub>2</sub>SO<sub>4</sub>. The solvent was removed by rotary evaporation, and the residue was purified by column chromatography. Then the collected product was added to CH<sub>2</sub>Cl<sub>2</sub> (90 mL), acetic acid (45 mL), and H<sub>2</sub>O<sub>2</sub> (2 mL). After stirring for 24 hours at 60 °C, the mixture was extracted with CH<sub>2</sub>Cl<sub>2</sub> and further purified by column chromatography, affording a white solid in a yield of 81%. <sup>1</sup>H NMR (500 MHz, CDCl<sub>3</sub>, δ [ppm]): 8.16 (dd, *J* = 8.0, 1.5 Hz, 2H, Ar H), 7.86 (d, *J* = 8.0 Hz, 1H, Ar H), 7.39-7.42 (m, 2H, Ar H), 7.24-7.27 (m, 3H, Ar H), 7.10 (dd, *J* = 8.5, 2.5 Hz, 1H, Ar H), 6.65 (d, *J* = 8.5 Hz, 2H, Ar H), 2.50 (s, 3H; CH<sub>3</sub>). <sup>13</sup>C NMR (125 MHz, CDCl<sub>3</sub>, δ [ppm]): 141.88, 140.53, 137.92, 135.14, 132.86, 132.56, 129.32, 126.30, 123.47, 122.76, 122.24, 117.14, 23.19. MS [m/z]: Calcd for C<sub>19</sub>H<sub>14</sub>BrNO<sub>2</sub>S: 398.9929, Found 421.9813 [M + Na]<sup>+</sup>.

**Synthesis of 10-(4-bromo-3,5-dimethylphenyl)-10*H*-phenothiazine 5,5-dioxide (BrDMOPP).**

Following the similar procedure to BrMOPP, just changing the 1-bromo-4-iodo-2-methylbenzene to 2-bromo-5-iodo-1,3-dimethylbenzene. A white solid was obtained in the yield of 78%. <sup>1</sup>H NMR (500 MHz, CDCl<sub>3</sub>, δ [ppm]): 8.16 (dd, *J* = 8.0, 1.5 Hz, 2H, Ar H), 7.39-7.42 (m, 2H, Ar H), 7.24-7.27 (m, 2H, Ar H), 7.11 (s, 2H, Ar H), 6.68 (d, *J* = 8.5 Hz, 2H, Ar H), 2.52 (s, 6H; CH<sub>3</sub>). <sup>13</sup>C NMR (125 MHz, CDCl<sub>3</sub>, δ [ppm]): 141.92, 140.52, 137.14, 132.78, 129.63, 128.83, 123.37, 122.63, 122.10, 117.22, 24.09. MS [m/z]: Calcd for C<sub>20</sub>H<sub>16</sub>BrNO<sub>2</sub>S: 413.0085, Found 435.9983 [M + Na]<sup>+</sup>.

**Synthesis of 10-(4-bromo-2,3,5,6-tetramethylphenyl)-10*H*-phenothiazine 5,5-dioxide (BrTMOPP).**

Phenothiazine (2.00 g, 10 mmol), 1,4-dibromo-2,3,5,6-tetramethylbenzene

(3.52 g, 12 mol), sodium tert-butoxide (1.44 g, 15 mmol), bis(dibenzylideneacetone)palladium (1.16 g, 2 mmol), and tri-tert-butylphosphine (0.5 mL, 0.25 mmol) were added in toluene (100 mL). Then the mixture was stirred at 110 °C for 12 hours. And then, The mixture was extracted with CH<sub>2</sub>Cl<sub>2</sub>. The solvent was evaporated by rotary evaporation under vacuum and the product was purified by column chromatography. Then the collected product was added to CH<sub>2</sub>Cl<sub>2</sub> (90 mL), acetic acid (45 mL), and H<sub>2</sub>O<sub>2</sub> (2 mL). After stirring for 24 hours at 60 °C, the mixture was extracted with CH<sub>2</sub>Cl<sub>2</sub> and further purified by column chromatography, affording a white solid in a yield of 61%. <sup>1</sup>H NMR (600 MHz, CDCl<sub>3</sub>, δ [ppm]): 8.20 (dd, *J* = 7.8, 1.8 Hz, 2H, Ar H), 8.40-7.43 (m, 2H, Ar H), 7.25-7.28 (m, 2H, Ar H), 6.49 (d, *J* = 9.0 Hz, 2H, Ar H), 2.53 (s, 6H; CH<sub>3</sub>), 1.95 (s, 6H; CH<sub>3</sub>). <sup>13</sup>C NMR (150 MHz, CDCl<sub>3</sub>, δ [ppm]): 138.86, 136.94, 134.85, 133.34, 130.57, 123.67, 122.71, 122.26, 116.17, 21.44, 15.68. MS [*m/z*]: Calcd for C<sub>22</sub>H<sub>20</sub>BrNO<sub>2</sub>S: 441.0398, Found 464.0291 [M + Na]<sup>+</sup>.

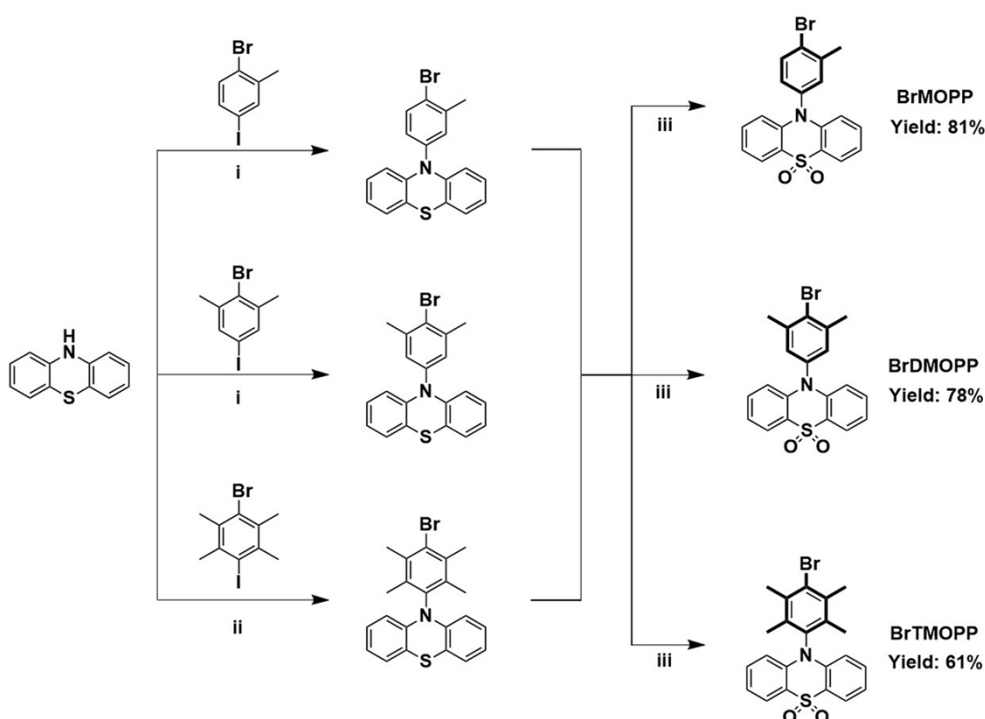

**Scheme S1.** Synthetic routes and chemical structures of **BrMOPP**, **BrDMOPP**, and **BrTMOPP**. (i) *t*-BuOK, Pd(OAc)<sub>2</sub>, P(*t*-Bu)<sub>3</sub>, Toluene, 110 °C. (ii) *t*-BuONa, Pd(dba)<sub>2</sub>, P(*t*-Bu)<sub>3</sub>, Toluene, 110 °C. (iii) H<sub>2</sub>O<sub>2</sub>, CH<sub>2</sub>Cl<sub>2</sub>/CH<sub>3</sub>COOH, 60 °C.

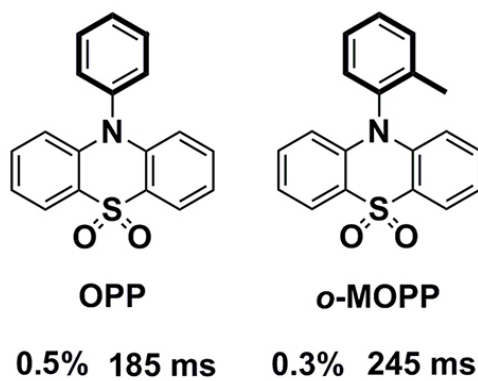

**Scheme S2.** Chemical structures of **OPP** and *o*-**MOPP**.

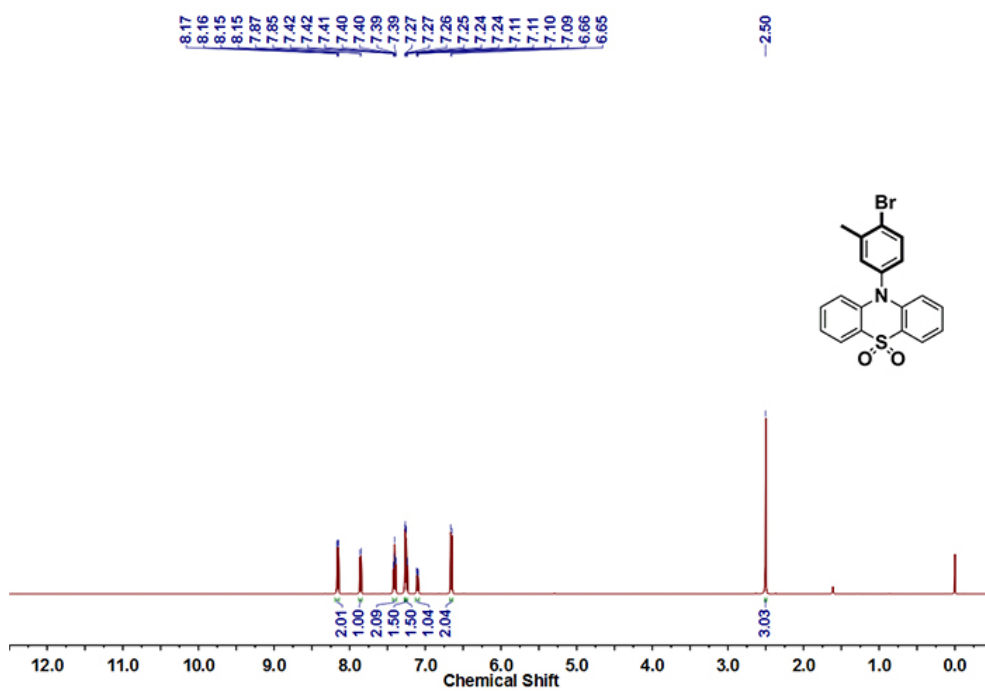

**Fig. S1** <sup>1</sup>H NMR of **BrMOPP** in CDCl<sub>3</sub>.

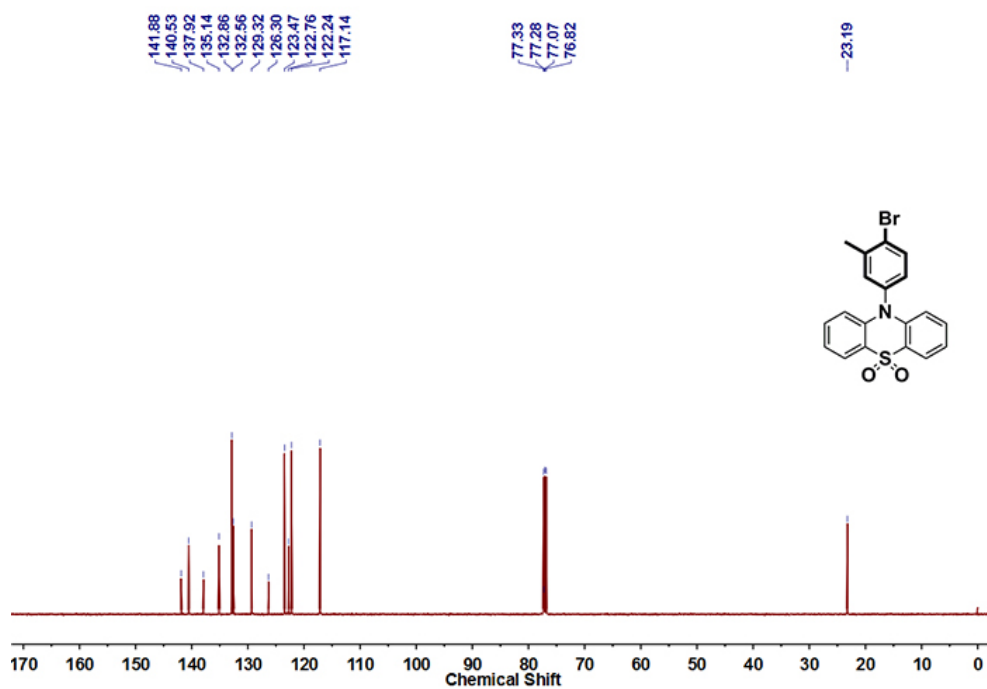

Fig. S2 <sup>13</sup>C NMR of BrMOPP in CDCl<sub>3</sub>.

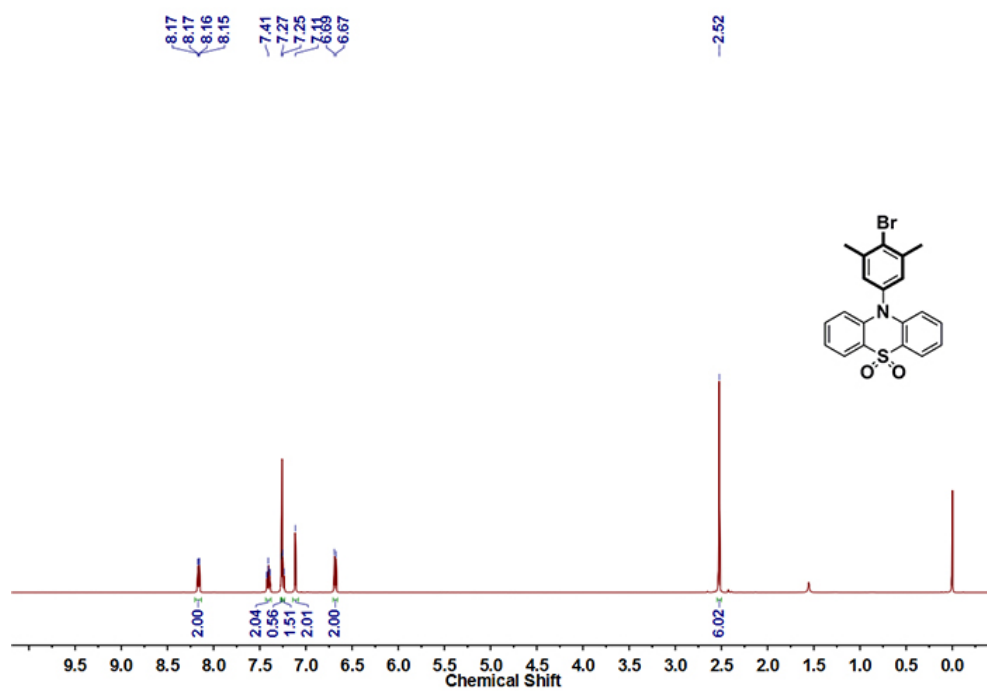

Fig. S3 <sup>1</sup>H NMR of BrDMOPP in CDCl<sub>3</sub>.

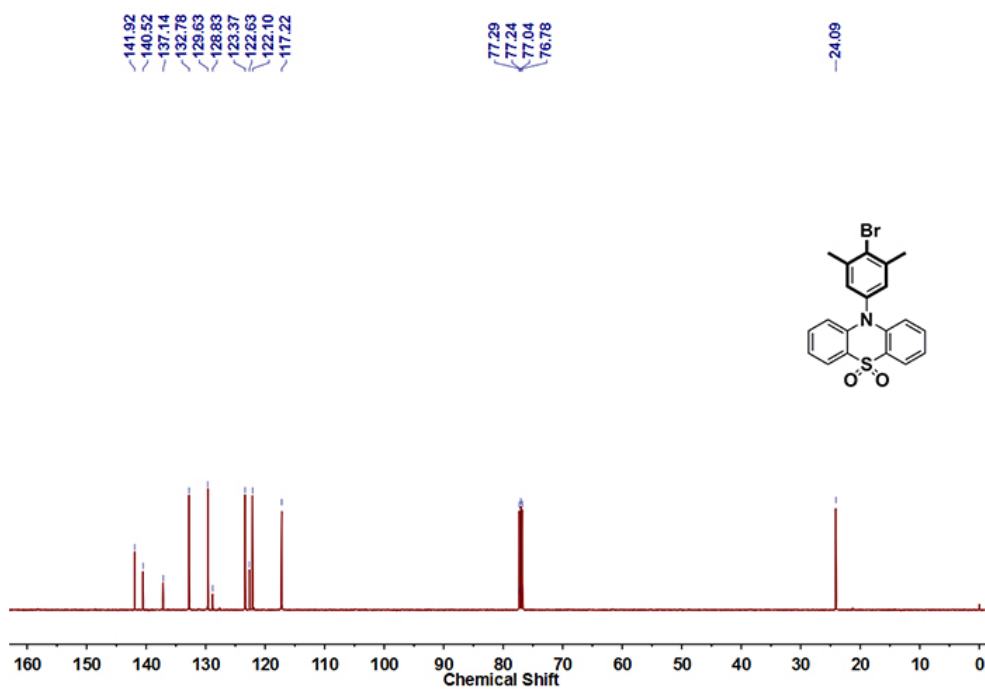

Fig. S4  $^{13}\text{C}$  NMR of **BrDMOPP** in  $\text{CDCl}_3$ .

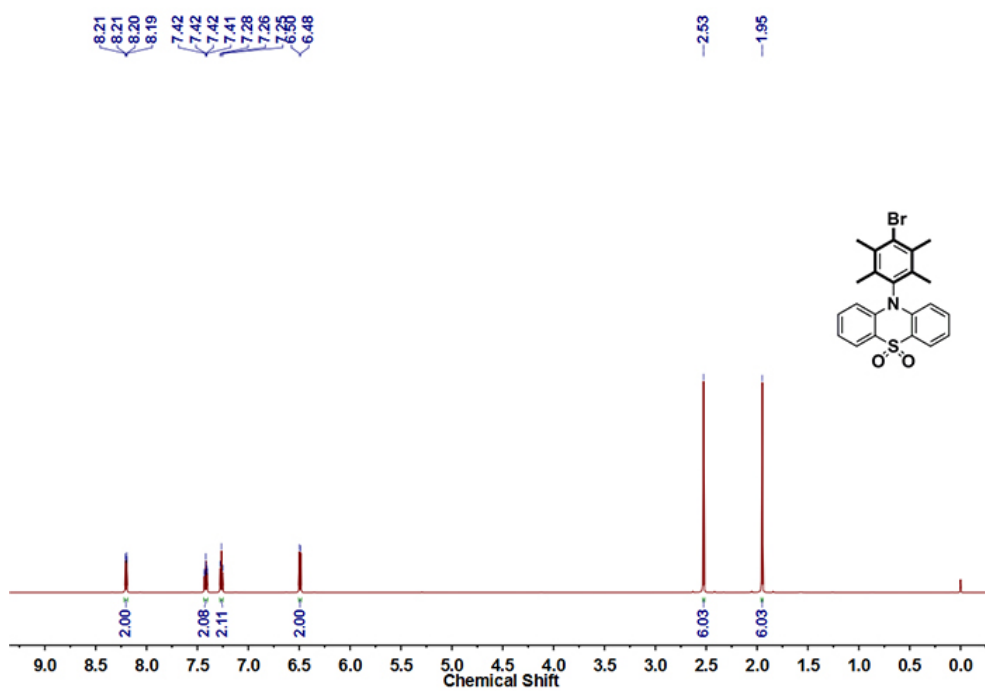

Fig. S5  $^1\text{H}$  NMR of **BrTMOPP** in  $\text{CDCl}_3$ .



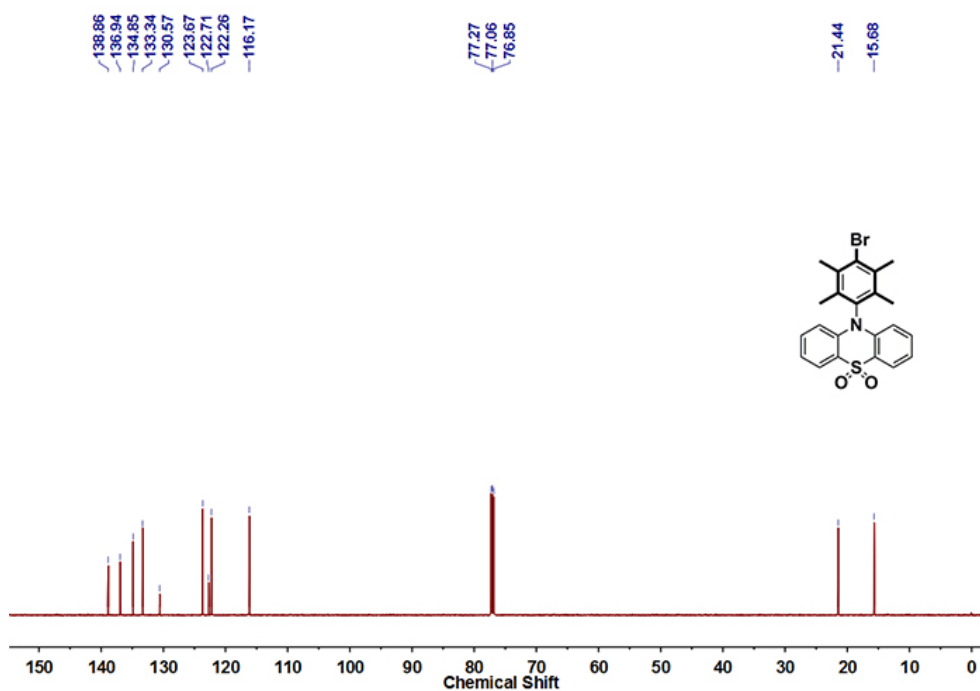

**Fig. S6**  $^{13}\text{C}$  NMR of **BrTMOPP** in  $\text{CDCl}_3$ .

**Table S1.** Crystal data and structure refinement of these compounds.

| Name                                        | <b>BrMOPP</b>                                     | <b>BrDMOPP</b>                                    | <b>BrTMOPP</b>                                    |
|---------------------------------------------|---------------------------------------------------|---------------------------------------------------|---------------------------------------------------|
| <b>CCDC</b>                                 | 2042977                                           | 2042978                                           | 2042979                                           |
| <b>Formula</b>                              | $\text{C}_{19}\text{H}_{14}\text{BrNO}_2\text{S}$ | $\text{C}_{20}\text{H}_{16}\text{BrNO}_2\text{S}$ | $\text{C}_{22}\text{H}_{20}\text{BrNO}_2\text{S}$ |
| <b>Formula weight</b>                       | 400.28                                            | 414.31                                            | 442.36                                            |
| <b>Crystal system</b>                       | triclinic                                         | triclinic                                         | triclinic                                         |
| <b>Space group</b>                          | P-1                                               | P-1                                               | P-1                                               |
| <b>Cell Lengths (Å)</b>                     | a 8.126(2)                                        | a 8.2210(16)                                      | a 8.3574(8)                                       |
|                                             | b 8.146(2)                                        | b 8.4240(17)                                      | b 9.3223(11)                                      |
|                                             | c 13.660(4)                                       | c 14.349(3)                                       | c 14.2727(16)                                     |
| <b>Cell Angles (°)</b>                      | $\alpha$ 95.851(15)                               | $\alpha$ 94.358(15)                               | $\alpha$ 73.231(7)                                |
|                                             | $\beta$ 97.291(16)                                | $\beta$ 98.812(13)                                | $\beta$ 83.188(6)                                 |
|                                             | $\gamma$ 112.652(14)                              | $\gamma$ 114.597(13)                              | $\gamma$ 64.864(5)                                |
| <b>Cell Volume (Å<sup>3</sup>)</b>          | 816.4(4)                                          | 882.0(3)                                          | 963.87(19)                                        |
| <b>Z</b>                                    | 2                                                 | 2                                                 | 2                                                 |
| <b>D<sub>calcd.</sub>(g m<sup>-3</sup>)</b> | 1.628                                             | 1.560                                             | 1.524                                             |
| <b>F(000)</b>                               | 404.0                                             | 420.0                                             | 452.0                                             |
| <b>R<sub>int</sub></b>                      | 0.0664                                            | 0.0939                                            | 0.0747                                            |
| <b>F<sup>2</sup></b>                        | 1.038                                             | 1.039                                             | 1.074                                             |

|                 |                |                |                |
|-----------------|----------------|----------------|----------------|
| $R_1^a, wR_2^b$ | 0.0804, 0.2703 | 0.0809, 0.2200 | 0.0446, 0.0971 |
| $R_1, wR_2$     | 0.0890, 0.2865 | 0.1142, 0.2506 | 0.0658, 0.1090 |

<sup>a</sup>  $R_1 = \frac{\sum ||F_o| - |F_c||}{\sum |F_o|}$ . <sup>b</sup>  $wR_2 = \frac{|\sum w(|F_o|^2 - |F_c|^2)|}{\sum w(F_o^2)^{1/2}}$ .

**Table S2.** The intermolecular interactions of **BrMOPP**, **BrDMOPP**, and **BrTMOPP** crystals.

| BrMOPP          |              | BrDMOPP         |              | BrTMOPP         |              |
|-----------------|--------------|-----------------|--------------|-----------------|--------------|
| Types of bond   | distance (Å) | Types of bond   | distance (Å) | Types of bond   | distance (Å) |
| $\pi \dots \pi$ | 3.387        | $\pi \dots \pi$ | 3.458        | $\pi \dots \pi$ | 3.496        |
| C-H...Br        | 3.035        | C-H...Br        | 2.855        | C-H...Br        | 2.964        |
| C-H... $\pi$    | 2.864        | -               | -            | C-H... $\pi$    | 2.875        |
|                 |              |                 |              | C-H...H-C       | 2.378        |
|                 | 2.472        |                 | 2.496        |                 | 2.446        |
| C-H...O         | 2.561        | C-H...O         | 2.568        | C-H...O         | 2.470        |
|                 | 2.625        |                 | 2.690        |                 | 2.705        |
| S=O...C         | 3.129        | S=O...C         | 3.156        | S=O...C         | 3.218        |

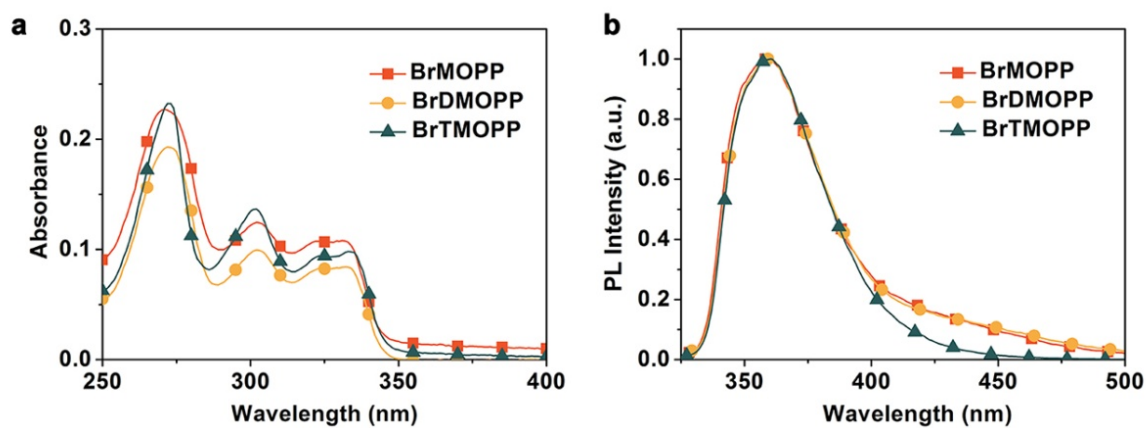

**Fig. S7** (a) Absorption spectra and (b) steady-state PL spectra of **BrMOPP**, **BrDMOPP**, and **BrTMOPP** in dilute dichloromethane solutions ( $10^{-5}$  M) under ambient conditions.

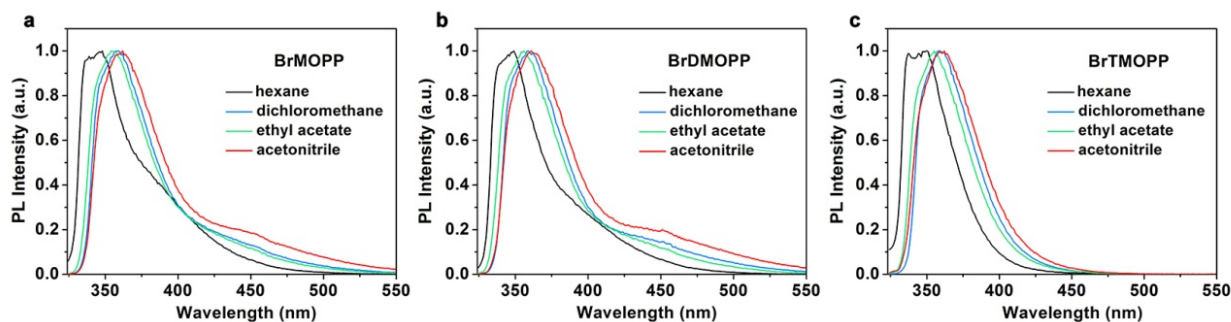

**Fig. S8** PL spectra of **BrMOPP**, **BrDMOPP**, and **BrTMOPP** in different solvents (hexane, dichloromethane, ethyl acetate, and acetonitrile) with concentration of  $5 \times 10^{-5}$  M.

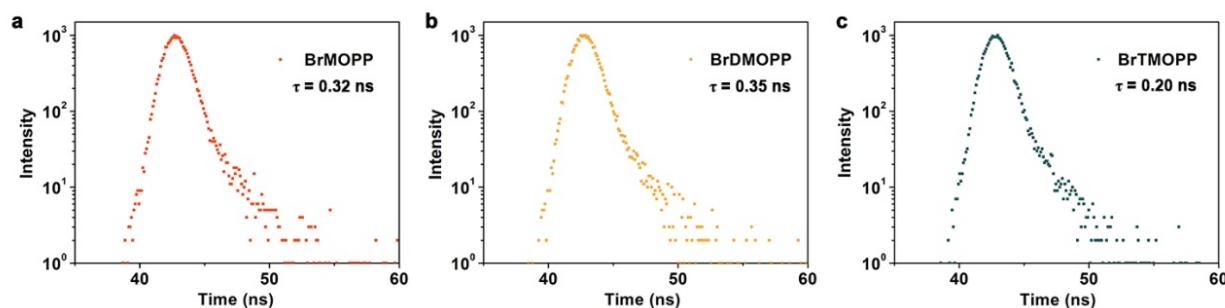

**Fig. S9** Time-resolved PL decay curves of (a) **BrMOPP** at 359 nm, (b) **BrDMOPP** at 359 nm, (c) **BrTMOPP** at 360 nm in dichloromethane solutions under ambient conditions.

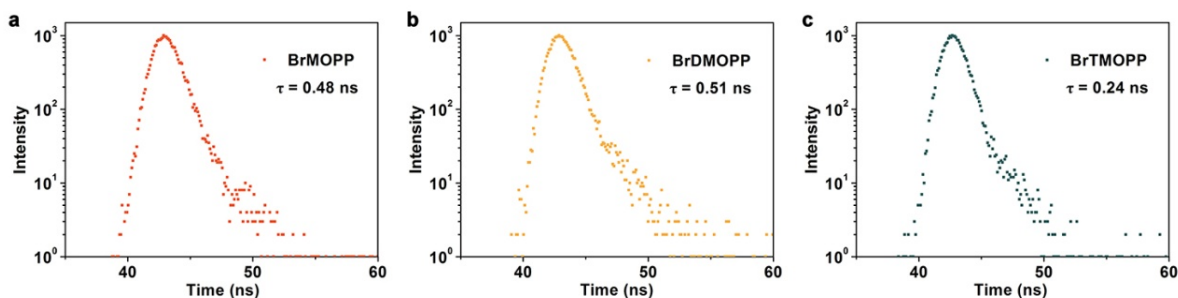

**Fig. S10** Time-resolved PL decay curves of (a) **BrMOPP** at 375 nm, (b) **BrDMOPP** at 375 nm, (c) **BrTMOPP** at 368 nm in crystal state under ambient conditions.

**Table S3.** Summarized photophysical data of **BrMOPP**, **BrDMOPP**, and **BrTMOPP** in crystal state at 298 K.

| Compound       | $\lambda_F$<br>(nm) | $\tau_F$<br>(ns) | $\Phi_F$<br>(%) | $\lambda_P$<br>(nm) | $\tau_P$<br>(ms) | $\Phi_P$<br>(%) | $k_{isc}$<br>( $s^{-1}$ ) | $k_T$<br>( $s^{-1}$ ) | $k_{nr}$<br>( $s^{-1}$ ) |
|----------------|---------------------|------------------|-----------------|---------------------|------------------|-----------------|---------------------------|-----------------------|--------------------------|
| <b>BrMOPP</b>  | 375                 | 0.48             | 4.8             | 512                 | 391              | 11.1            | $2.3 \times 10^8$         | 0.28                  | 2.27                     |
| <b>BrDMOPP</b> | 375                 | 0.51             | 3.6             | 500                 | 255              | 8.4             | $1.6 \times 10^8$         | 0.33                  | 3.59                     |
| <b>BrTMOPP</b> | 368                 | 0.24             | 1.6             | 519                 | 664              | 4.0             | $1.7 \times 10^8$         | 0.06                  | 1.44                     |

$\lambda_F$ : fluorescent emission peak;  $\tau_F$ : fluorescent lifetime;  $\lambda_P$ : phosphorescent emission peak;  $\tau_P$ : phosphorescent lifetime;  $\Phi_P$ : quantum yield.

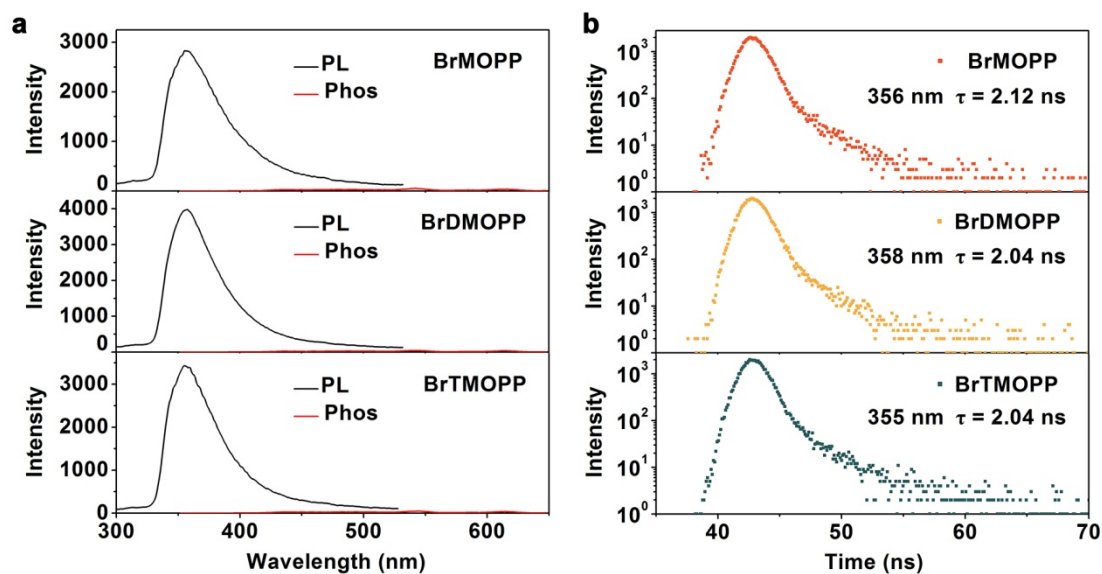

**Fig. S11** (a) Steady-state photoluminescence (PL) (black line) and phosphorescence (Phos) spectra (red line) and (b) the time-resolved fluorescence decay curves of **BrMOPP**, **BrDMOPP**, and **BrTMOPP** doped in PMMA films (5 wt%) under ambient conditions excited at 330 nm.

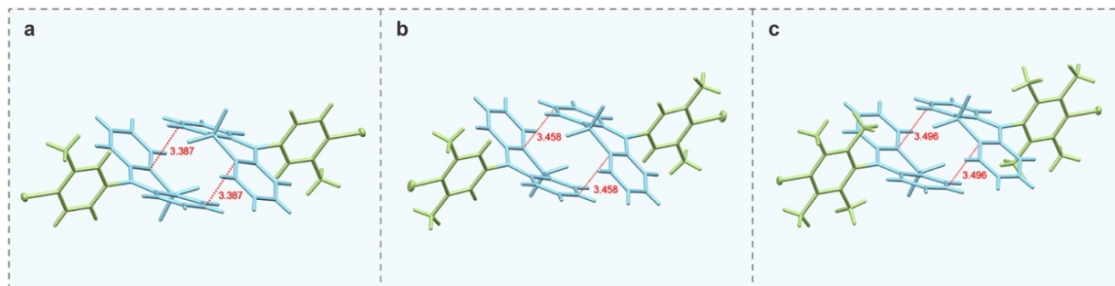

**Fig. S12** Intermolecular interactions of adjacent dimer molecules in (a) **BrMOPP**, (b) **BrDMOPP**, and (c) **BrTMOPP** crystals.

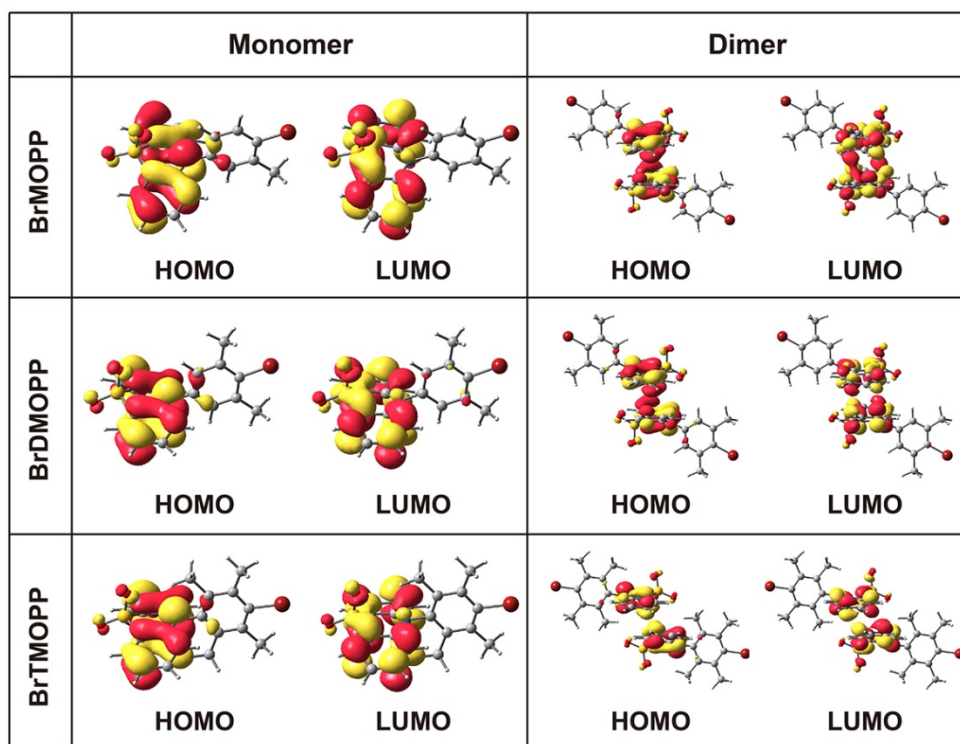

**Fig. S13** Calculated the highest occupied molecular orbitals (HOMO) and the lowest unoccupied molecular orbitals (LUMO) of **BrMOPP**, **BrDMOPP**, and **BrTMOPP** in monomer and dimer.

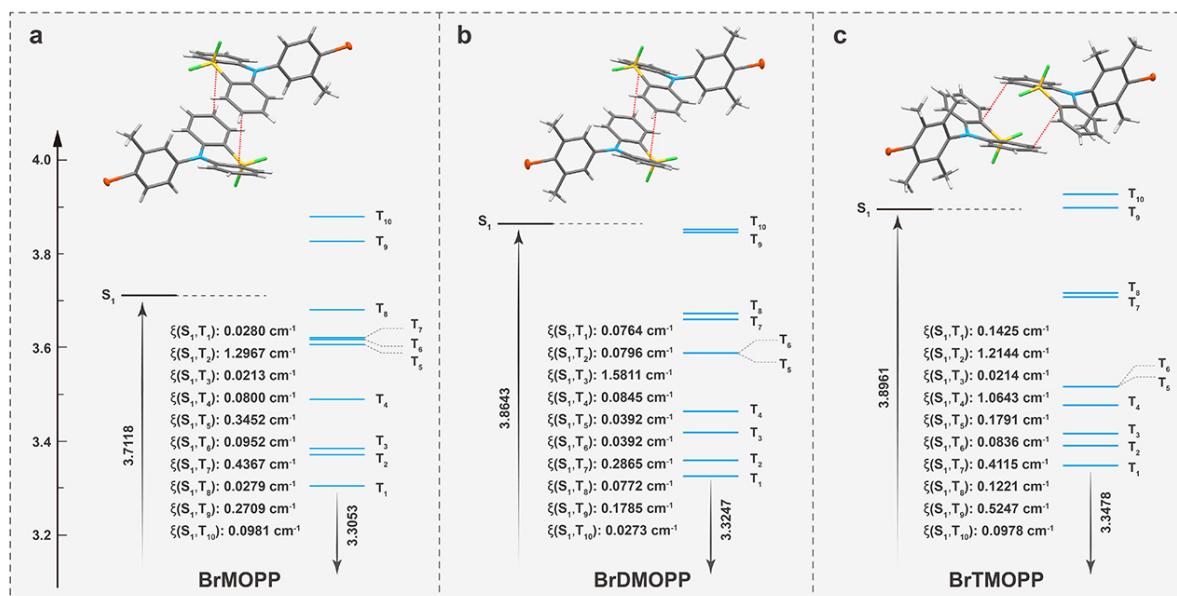

**Fig. S14** Calculated energy diagram and spin-orbit coupling constant ( $\xi$ ) of (a) **BrMOPP** dimer, (b) **BrDMOPP** dimer, and (c) **BrTMOPP** dimer in crystal states.

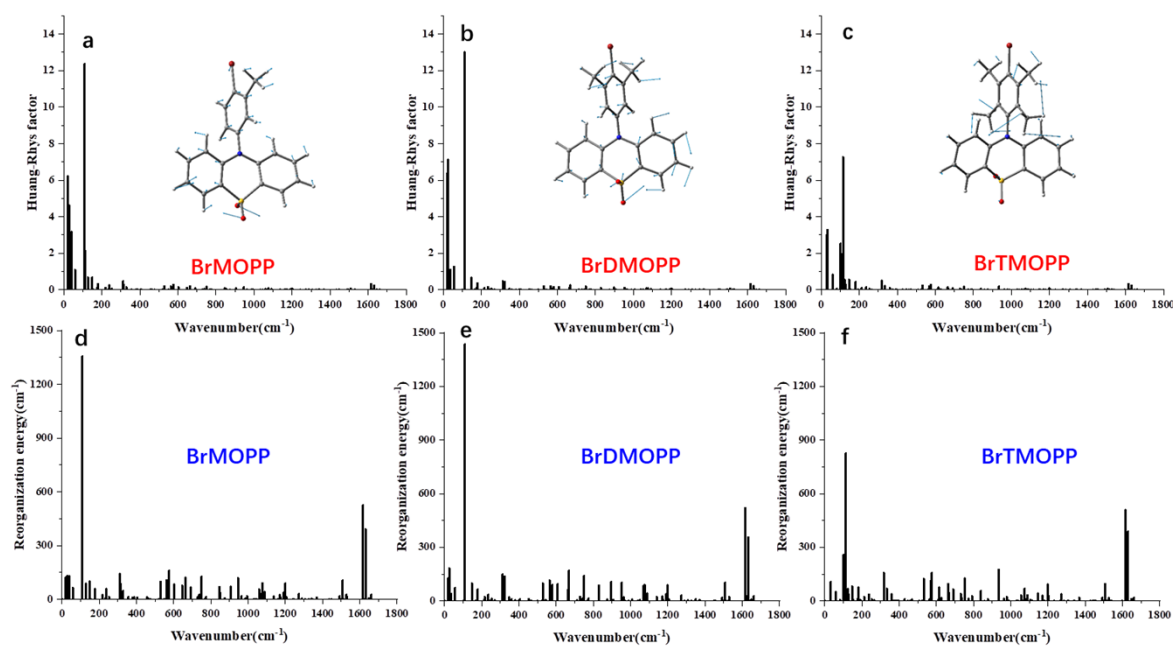

**Fig. S15** The calculated Huang-Rhys factors, the displacement vectors of vibrational modes with the largest values of Huang-Rhys factors, and reorganization energies for **BrMOPP**, **BrDMOPP**, and **BrTMOPP** in crystals at  $T_1$  states.

## References

- 1 M. J. Frisch, G. W. Trucks, H. B. Schlegel, G. E. Scuseria, M. A. Robb, J. R. Cheeseman, G. Scalmani, V. Barone, B. Mennucci, G. A. Petersson, H. Nakatsuji, M. Caricato, X. Li, H. P. Hratchian, A. F. Izmaylov, J. Bloino, G. Zheng, J. L. Sonnenberg, M. Hada, M. Ehara, K. Toyota, R. Fukuda, J. Hasegawa, M. Ishida, T. Nakajima, Y. Honda, O. Kitao, H. Nakai, T. Vreven, J. A. Montgomery Jr., J. E. Peralta, F. Ogliaro, M. J. Bearpark, J. Heyd, E. N. Brothers, K. N. Kudin, V. N. Staroverov, R. Kobayashi, J. Normand, K. Raghavachari, A. P. Rendell, J. C. Burant, S. S. Iyengar, J. Tomasi, M. Cossi, N. Rega, N. J. Millam, M. Klene, J. E. Knox, J. B. Cross, V. Bakken, C. Adamo, J. Jaramillo, R. Gomperts, R. E. Stratmann, O. Yazyev, A. J. Austin, R. Cammi, C. Pomelli, J. W. Ochterski, R. L. Martin, K. Morokuma, V. G. Zakrzewski, G. A. Voth, P. Salvador, J. J. Dannenberg, S. Dapprich, A. D. Daniels, Farkas, J. B. Foresman, J. V. Ortiz, J. Cioslowski,

- D. J. Fox, Gaussian 16, Revision B.01, Gaussian Inc., Wallingford CT, 2016.
- 2 ADF, SCM, Theoretical Chemistry, Vrije Universiteit, Amsterdam, The Netherlands, 2016.
  - 3 Y. Niu, W. Li, Q. Peng, H. Geng, Y. Yi, L. Wang, G. Nan, D. Wang and Z. Shuai, *Mol. Phys.*, 2018, **116**, 1078-1090.
  - 4 M. E. Casida, C. Jamorski, K. C. Casida and D. R. Salahub, *J. Chem. Phys.*, 1998, **108**, 4439-4449.
  - 5 M. C. Li, M. Hayashi and S. H. Lin, *J. Phys. Chem. A*, 2011, **115**, 14531-14538.
  - 6 Y. C. Duan, Y. Wu, J. L. Jin, D. M. Gu, Y. Geng, M. Zhang and Z. M. Su, *Chem. Phys. Chem.*, 2017, **18**, 755-762.
  - 7 E. V. Lenthe, J. G. Snijders and E. J. Baerends, *J. Chem. Phys.*, 1996, **105**, 6505-6516.
